# Supplementary material for: Determinants of physician attitudes towards the new selective measles vaccine mandate in Germany
Source: Springer Nature journal article supplement (doi:10.1186/s12889-021-10563-9), 2021-03-22
Supplement: MOESM1 [file 18990994]

**Determinants of physician attitudes towards the new selective measles vaccine mandate  
in Germany**

Julia Neufeind<sup>1,2</sup>, Cornelia Betsch<sup>3,4</sup>, Vera Zylka-Menhorn<sup>5</sup>, Ole Wichmann<sup>1</sup>

<sup>1</sup>Immunization Unit, Robert Koch-Institute, Berlin, Germany

<sup>2</sup>Charité University Medicine Berlin, Berlin, Germany

<sup>3</sup>Center for Empirical Research in Economics and Behavioral Sciences (CEREB),  
University of Erfurt, Erfurt, Germany

<sup>4</sup>Media and Communication Science, University of Erfurt, Erfurt, Germany

<sup>5</sup>Deutsches Ärzteblatt, Cologne, Germany

Supplementary Table 1

*Mediation analyses: Effect of occupational group (X) on attitude towards mandates (Y) via expected consequences (M).*

| Mediator variable model (outcome: expected consequences)      |          |      |                       |          |
|---------------------------------------------------------------|----------|------|-----------------------|----------|
| Predictor                                                     | <i>B</i> | SE   | 95% CI                | <i>p</i> |
| Constant                                                      | 2.30     | 0.33 | (1.66-2.95)           |          |
| Occupational group                                            | 0.50     | 0.07 | (0.39-0.61)           | <.001    |
| Dependent variable model (outcome: attitude towards mandates) |          |      |                       |          |
| Model summary: R <sup>2</sup> = 0.29                          |          |      |                       |          |
| Predictor                                                     | <i>B</i> | SE   | 95% CI                | <i>p</i> |
| Constant                                                      | 1.10     | 0.30 | (0.52-1.69)           |          |
| Occupational group                                            | 0.07     | 0.05 | (-0.03-0.17)          | .19      |
| expected consequences                                         | 0.25     | 0.02 | (0.21-0.29)           | <.001    |
| Indirect effect of X on Y via expected consequences           |          |      |                       |          |
| Mediator                                                      | <i>B</i> |      | 95% Quasi-Bayesian CI | <i>p</i> |
| expected consequences                                         | 0.13     |      | (0.09-0.16)           | <.001    |

*n* = 1,974

Occupational groups: 0 = pediatrician, 1 = other physicians. attitude towards mandates: mean score consisting of four items (Cronbach's alpha = .88) expressing negative attitude (score = 1) to positive attitude (score = 5). Expected consequence of the mandate: item 'I expect more children to be vaccinated on time' (1=disagree; 5=strongly agree). 95% CI: 95% confidence interval with lower and upper border.  $\beta$  coefficients are adjusted for sociodemographic characteristics, communication self-efficacy, patient clientele and 5C psychological determinants.

## Supplementary Table 2

### *Sociodemographic characteristics of the study population and of physicians in Germany<sup>a</sup>*

| Variable      | Level   | Pediatrician     |                 | GP               |                  | Gynecologist     |                  | Internist        |                  |
|---------------|---------|------------------|-----------------|------------------|------------------|------------------|------------------|------------------|------------------|
|               |         | Study population | in Germany      | Study population | in Germany       | Study population | in Germany       | Study population | in Germany       |
| n             |         | 376              | 7,832           | 1,178            | 34,554           | 259              | 12,611           | 416              | 28,732           |
| Gender: n (%) | Male    | 173<br>(48.2)    | 3,493<br>(44.6) | 512<br>(46.0)    | 17,908<br>(51.8) | 63<br>(25.6)     | 3,992<br>(31.7)  | 221<br>(55.1)    | 18,403<br>(64.1) |
|               | Female  | 186<br>(51.8)    | 4,339<br>(55.4) | 601<br>(54.0)    | 16,646<br>(48.2) | 183<br>(74.4)    | 8,619<br>(68.3)  | 180<br>(44.9)    | 10,329<br>(35.9) |
| Region: n (%) | Western | 283<br>(80.2)    | 6,193<br>(79.1) | 895<br>(81.4)    | 27,837<br>(80.6) | 184<br>(75.7)    | 10,090<br>(80.0) | 321<br>(80.2)    | 22,576<br>(78.6) |
|               | Eastern | 70<br>(19.8)     | 1,639<br>(20.9) | 205<br>(18.6)    | 6,717<br>(19.4)  | 59<br>(24.3)     | 2,521<br>(20.0)  | 79<br>(19.8)     | 6,156<br>(21.4)  |

<sup>a</sup> Statistical Information from the Federal Registry of Physicians, 2019
